# Supplementary material
Source: publisher figshare collection journal article supplement (https://frontiersin.figshare.com/ndownloader/files/21189210)
Supplement: Supplementary file [file 21189210]

# Supplementary Figure S1

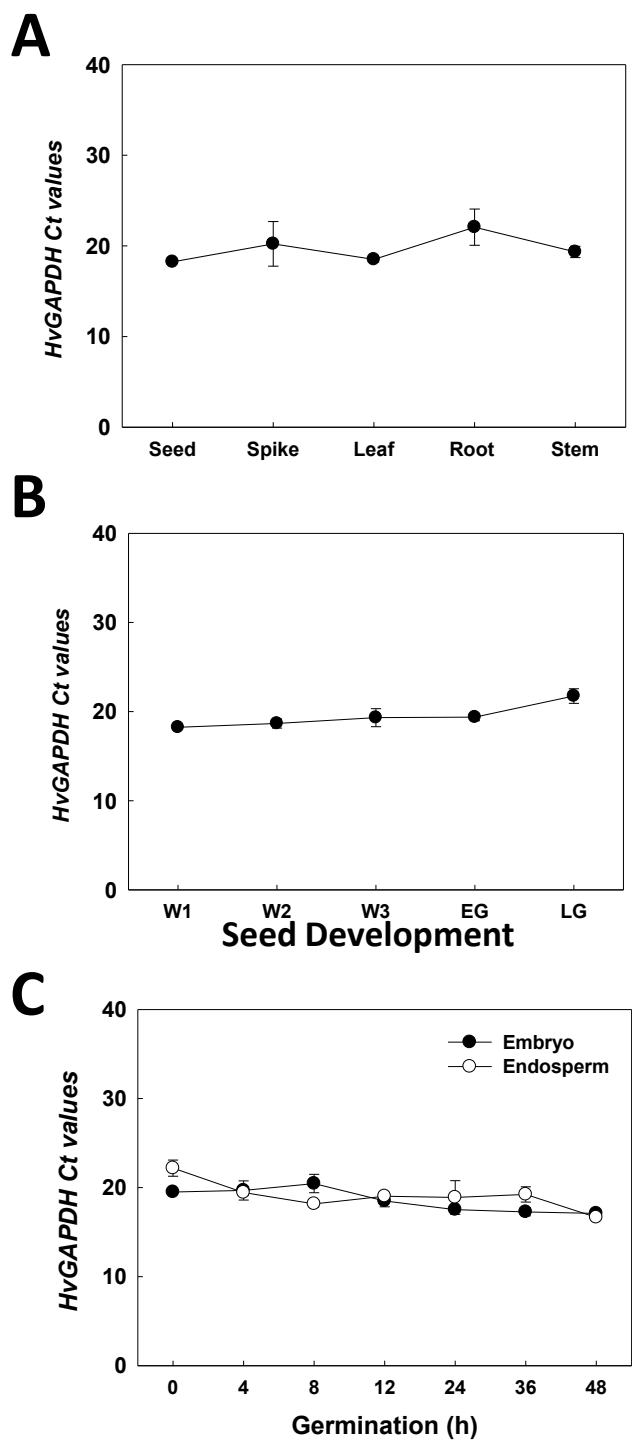

**Supplementary FIGURE S1:** Transcription levels (Ct mean values) of the *HvGAPDH* gene, housekeeping gene used to normalize the quantitative PCR data, **(A)** in different vegetative (leaf, root, stem) and reproductive (seed, spikes) organs, **(B)** upon seed development and **(C)** at different time point of germination (0, 4, 8, 12, 24, 36, 48 h). White 1: W1; White 2: W2; White 3: W3; Early Green: EG; Late Green: LG.

## Supplementary Figure S2

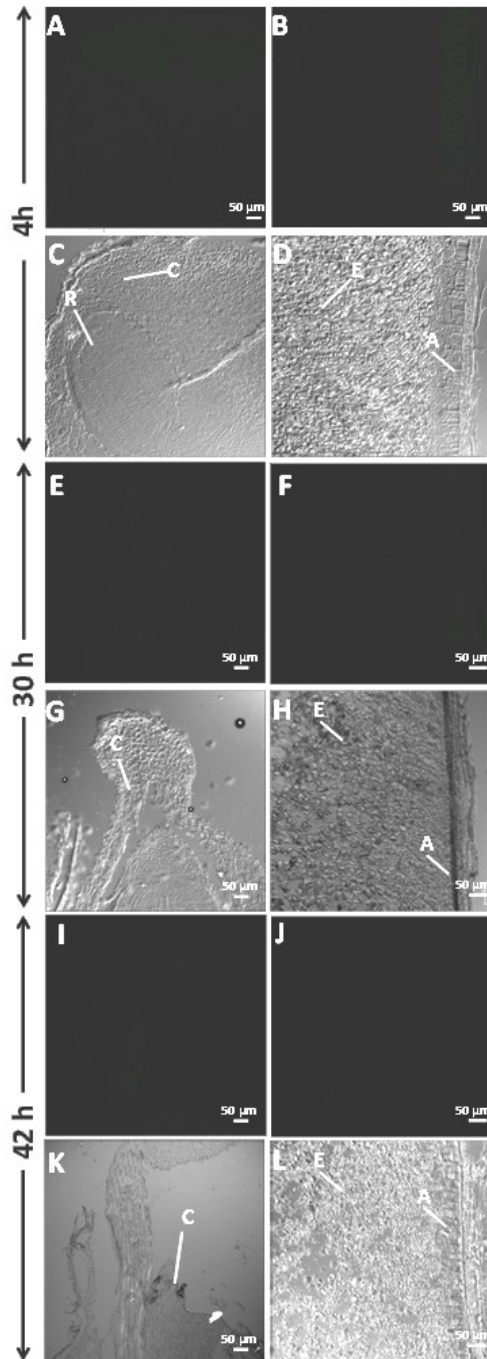

**Supplementary FIGURE S2:** Secondary Antibody negative controls of sections presented in Figure 6. (A-D) 4 h of seed germination. (E-H) 30 h of seed germination. (I-L) 42 h of seed germination. (C-D,G-H, K-L) DIC images. AL: Aleurone Layer; C: Coleorhize; E: Endosperm; R: Root.
